# Supplementary material for: Therapeutic Efficacy of Curcumin Enhanced by Microscale Discoidal Polymeric Particles in a Murine Asthma Model
Source: PubMed Central journal article supplement (PMC7463530; doi:10.3390/pharmaceutics12080739), 2020-08-06
Supplement: pharmaceutics-12-00739-s001.pdf [file pharmaceutics-12-00739-s001.pdf]

# Supplementary Materials: Enhanced therapeutic efficacy of curcumin by microscale discoidal polymeric particles in a murine asthma model

Jun Young Park, Ga Eul Chu, Sanghyo Park, Chaewon Park, Susmita Aryal, Won Jun Kang, Won Gil Cho and Jaehong Key

**Table S1.** Effect of Cur-PLGA-DPPs administration on hematological parameters. Shown are mean values  $\pm$  standard deviation (n = 4).

| Parameter                      | Control          | OVA               | OVA + Cur-PLGA-DPPs<br>5 mg/kg | OVA + Cur-PLGA-DPPs<br>25 mg/kg | OVA + Curcumin<br>4 mg/kg |
|--------------------------------|------------------|-------------------|--------------------------------|---------------------------------|---------------------------|
| Red blood cell (M/ $\mu$ L)    | 11.2 $\pm$ 1.2   | 14.1 $\pm$ 1.7    | 10.9 $\pm$ 0.7                 | 11.4 $\pm$ 0.7                  | 14.2 $\pm$ 1.1            |
| Hemoglobin (g/dL)              | 18.7 $\pm$ 2.0   | 21.8 $\pm$ 1.2    | 17.1 $\pm$ 1.2                 | 16.5 $\pm$ 0.9                  | 23.0 $\pm$ 2.2            |
| Hematocrit (%)                 | 66.7 $\pm$ 6.4   | 82.2 $\pm$ 6.4    | 62.2 $\pm$ 3.7                 | 59.7 $\pm$ 3.0                  | 82.6 $\pm$ 8.0            |
| Mean corpuscular volume (fL)   | 59.9 $\pm$ 1.4   | 58.6 $\pm$ 2.6    | 57.1 $\pm$ 1.2                 | 52.4 $\pm$ 1.4                  | 58.2 $\pm$ 1.1            |
| Mean Cell Hemoglobin (MCH; pg) | 16.8 $\pm$ 0.5   | 15.6 $\pm$ 1.0    | 15.6 $\pm$ 0.5                 | 14.5 $\pm$ 0.6                  | 16.2 $\pm$ 0.6            |
| MCH Concentration (g/dL)       | 28.0 $\pm$ 0.7   | 26.6 $\pm$ 1.2    | 27.4 $\pm$ 0.4                 | 27.7 $\pm$ 0.4                  | 27.8 $\pm$ 0.8            |
| White blood cell (k/ $\mu$ L)  | 4.9 $\pm$ 3.6    | 4.5 $\pm$ 1.2     | 3.1 $\pm$ 0.3                  | 6.6 $\pm$ 1.2                   | 6.8 $\pm$ 1.1             |
| Neutrophil (k/ $\mu$ L)        | 0.6 $\pm$ 0.4    | 0.8 $\pm$ 0.3     | 0.7 $\pm$ 0.1                  | 1.4 $\pm$ 0.2                   | 1.6 $\pm$ 0.2             |
| Lymphocyte (k/ $\mu$ L)        | 4.0 $\pm$ 3.1    | 3.2 $\pm$ 1.0     | 2.9 $\pm$ 1.7                  | 4.8 $\pm$ 1.0                   | 4.9 $\pm$ 0.9             |
| Monocyte (k/ $\mu$ L)          | 0.2 $\pm$ 0.2    | 0.3 $\pm$ 0.1     | 0.3 $\pm$ 0.1                  | 0.4 $\pm$ 0.1                   | 0.3 $\pm$ 0.0             |
| Eosinophil (k/ $\mu$ L)        | 0.0 $\pm$ 0.0    | 0.1 $\pm$ 0.0     | 0.0 $\pm$ 0.0                  | 0.0 $\pm$ 0.0                   | 0.1 $\pm$ 0.0             |
| Basophil (k/ $\mu$ L)          | 0.0 $\pm$ 0.0    | 0.0 $\pm$ 0.0     | 0.0 $\pm$ 0.0                  | 0.0 $\pm$ 0.0                   | 0.0 $\pm$ 0.0             |
| Platelet (k/ $\mu$ L)          | 853.0 $\pm$ 38.7 | 979.5 $\pm$ 200.1 | 651.7 $\pm$ 64.3               | 607.0 $\pm$ 31.5                | 835.0 $\pm$ 86.2          |
